# Supplementary material for: Enhanced atrial internal-external neural remodeling facilitates atrial fibrillation in the chronic obstructive sleep apnea model
Source: PubMed Central journal article supplement (PMC7895341; doi:10.1371/journal.pone.0247308), 2021-02-19

**Raw data—blot**

**A (Fig 5A, Fig 8E, Fig 8I )**

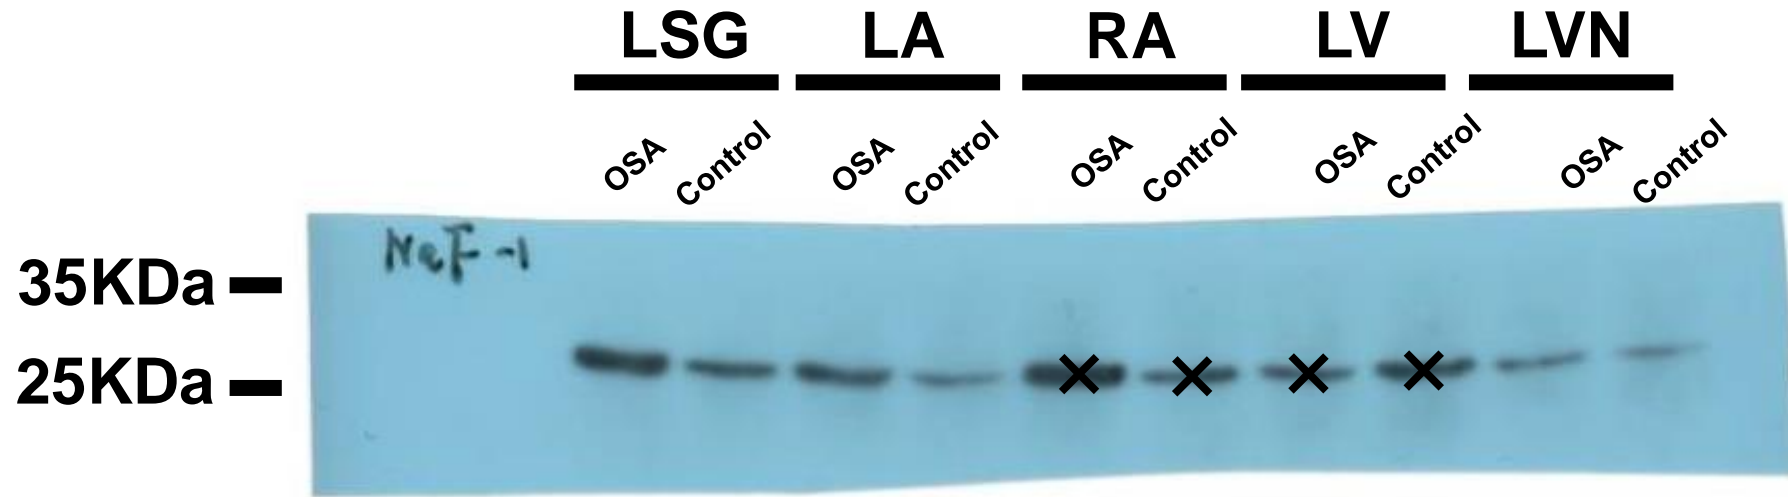

**B (Fig 5A, Fig 8E, Fig 8I )**

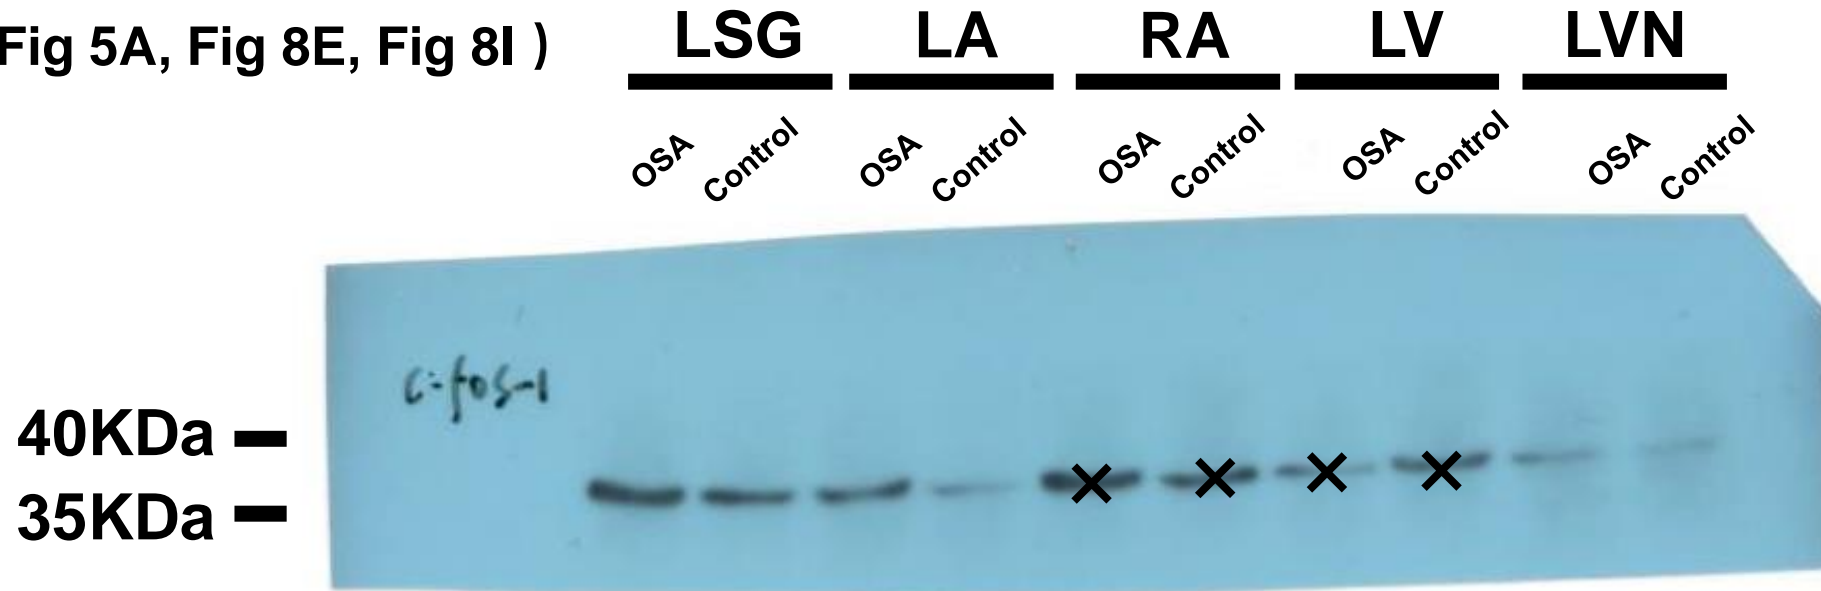

C (Fig 5A, Fig 8E, Fig 8I )

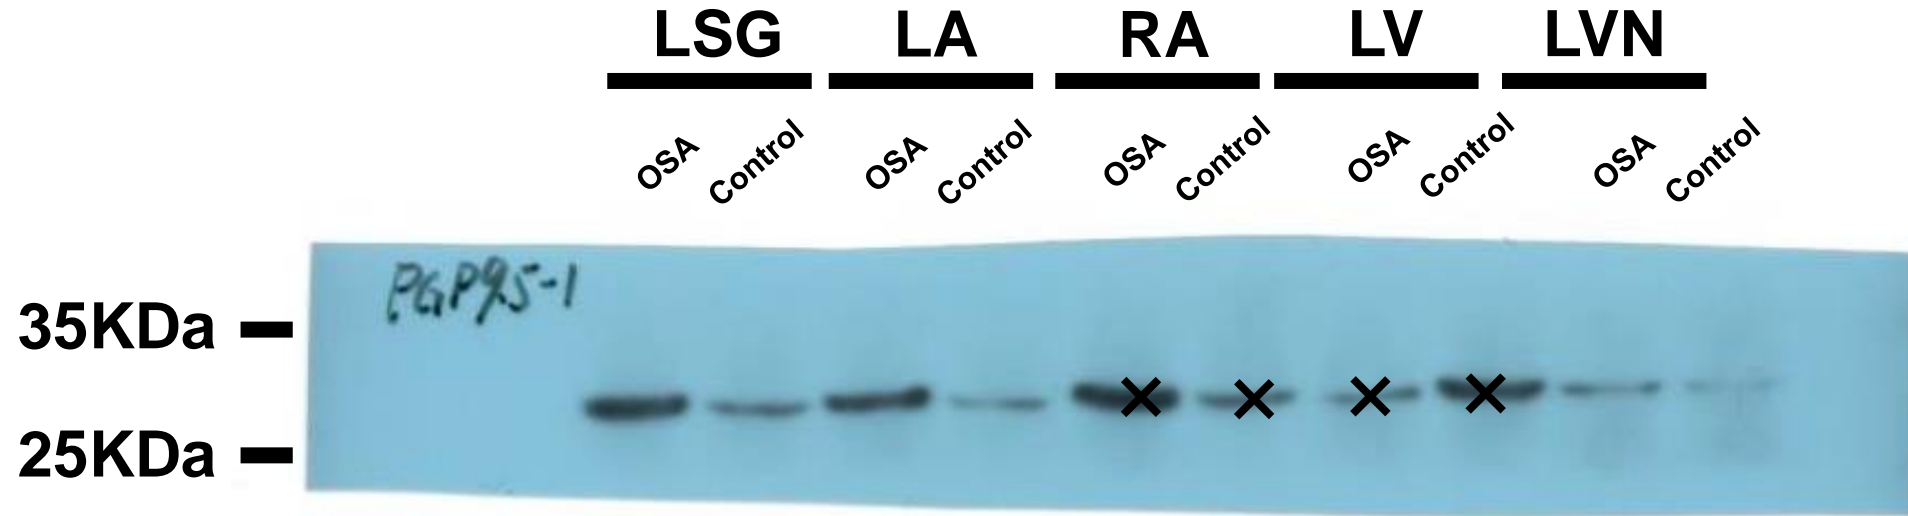

D (Fig 5A, Fig 8E, Fig 8I )

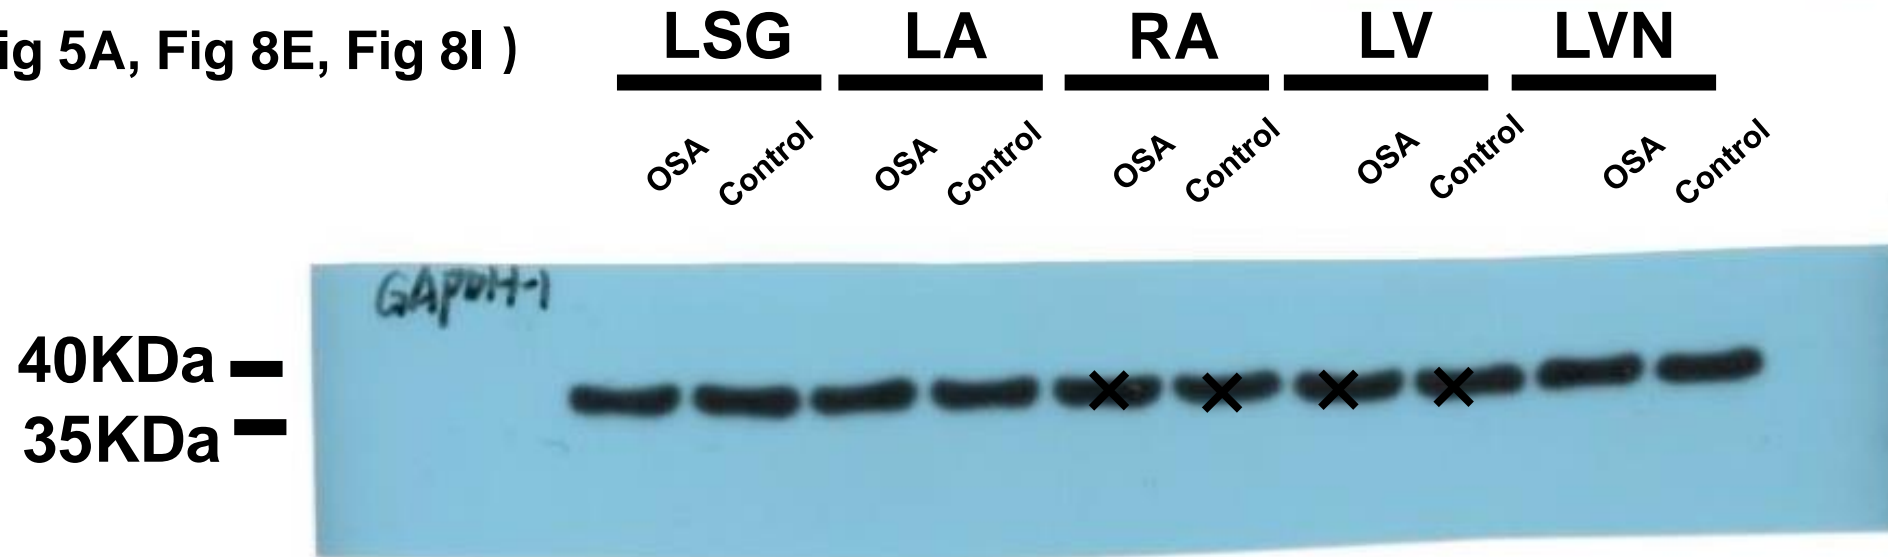

E (Fig 5A)

**LSG**                      **LA**  
-----  
OSA      Control      OSA      Control

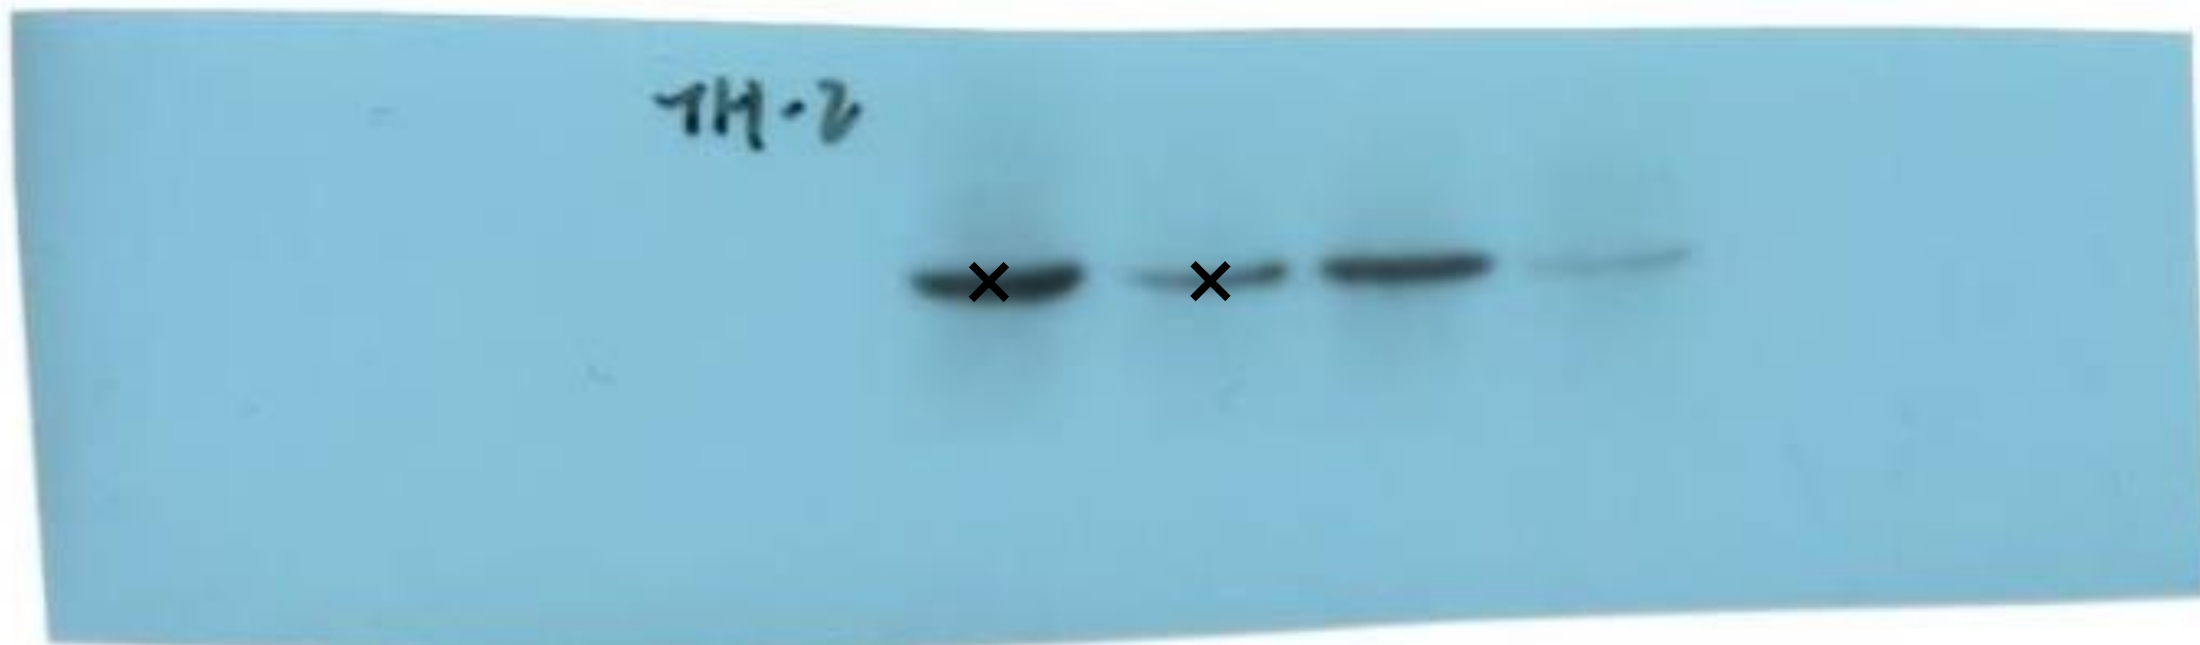

70KDa —  
50KDa —

TH-2

x      x

F (Fig 5A)

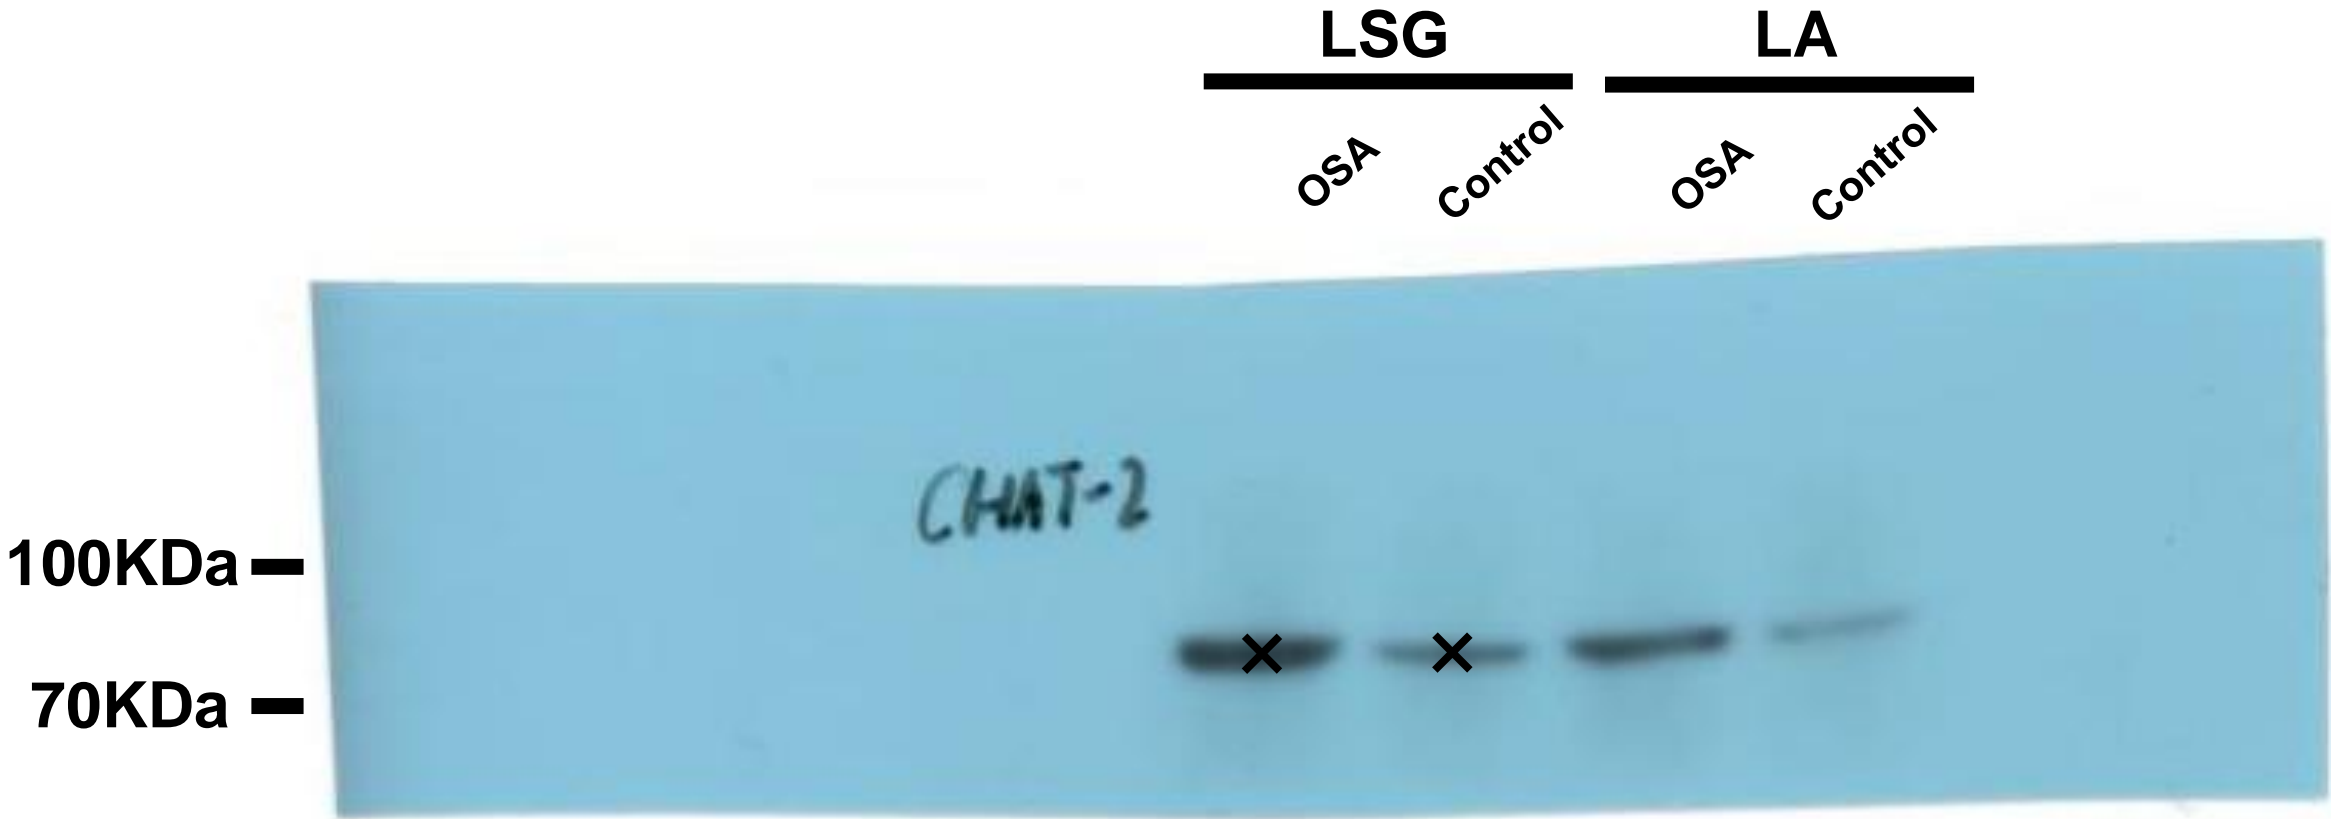

G (Fig 5A)

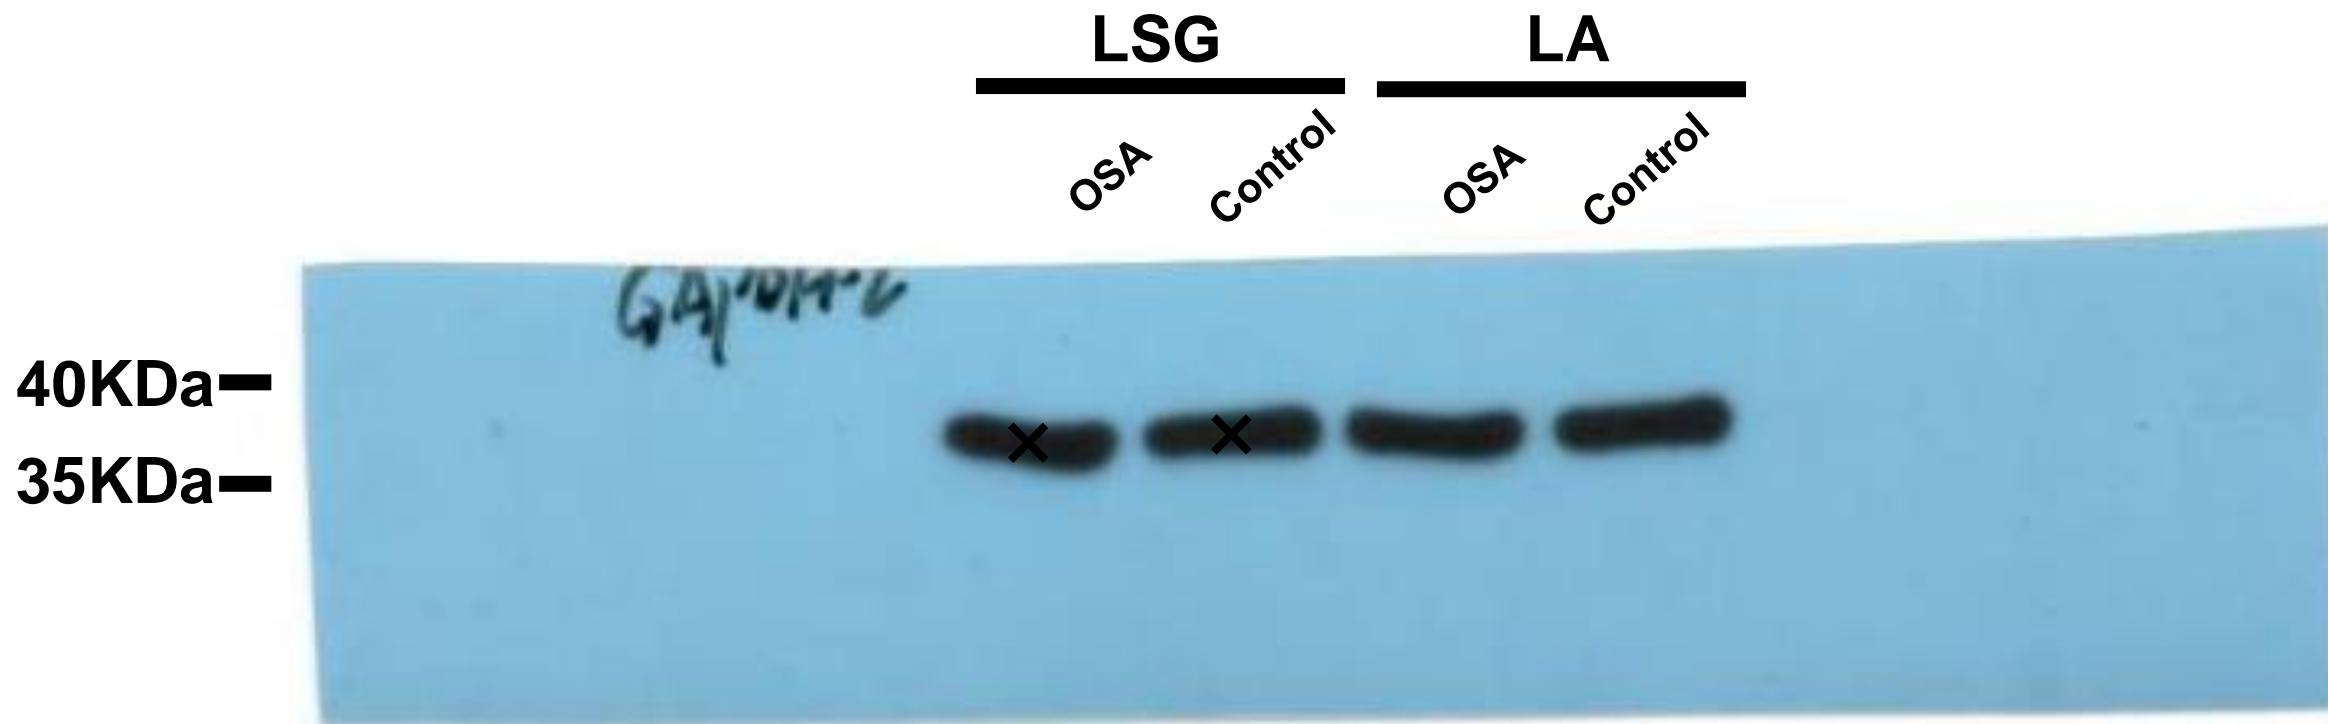

**Raw data——Atrial electrophysiology  
measurements**

# A (Fig 2D)

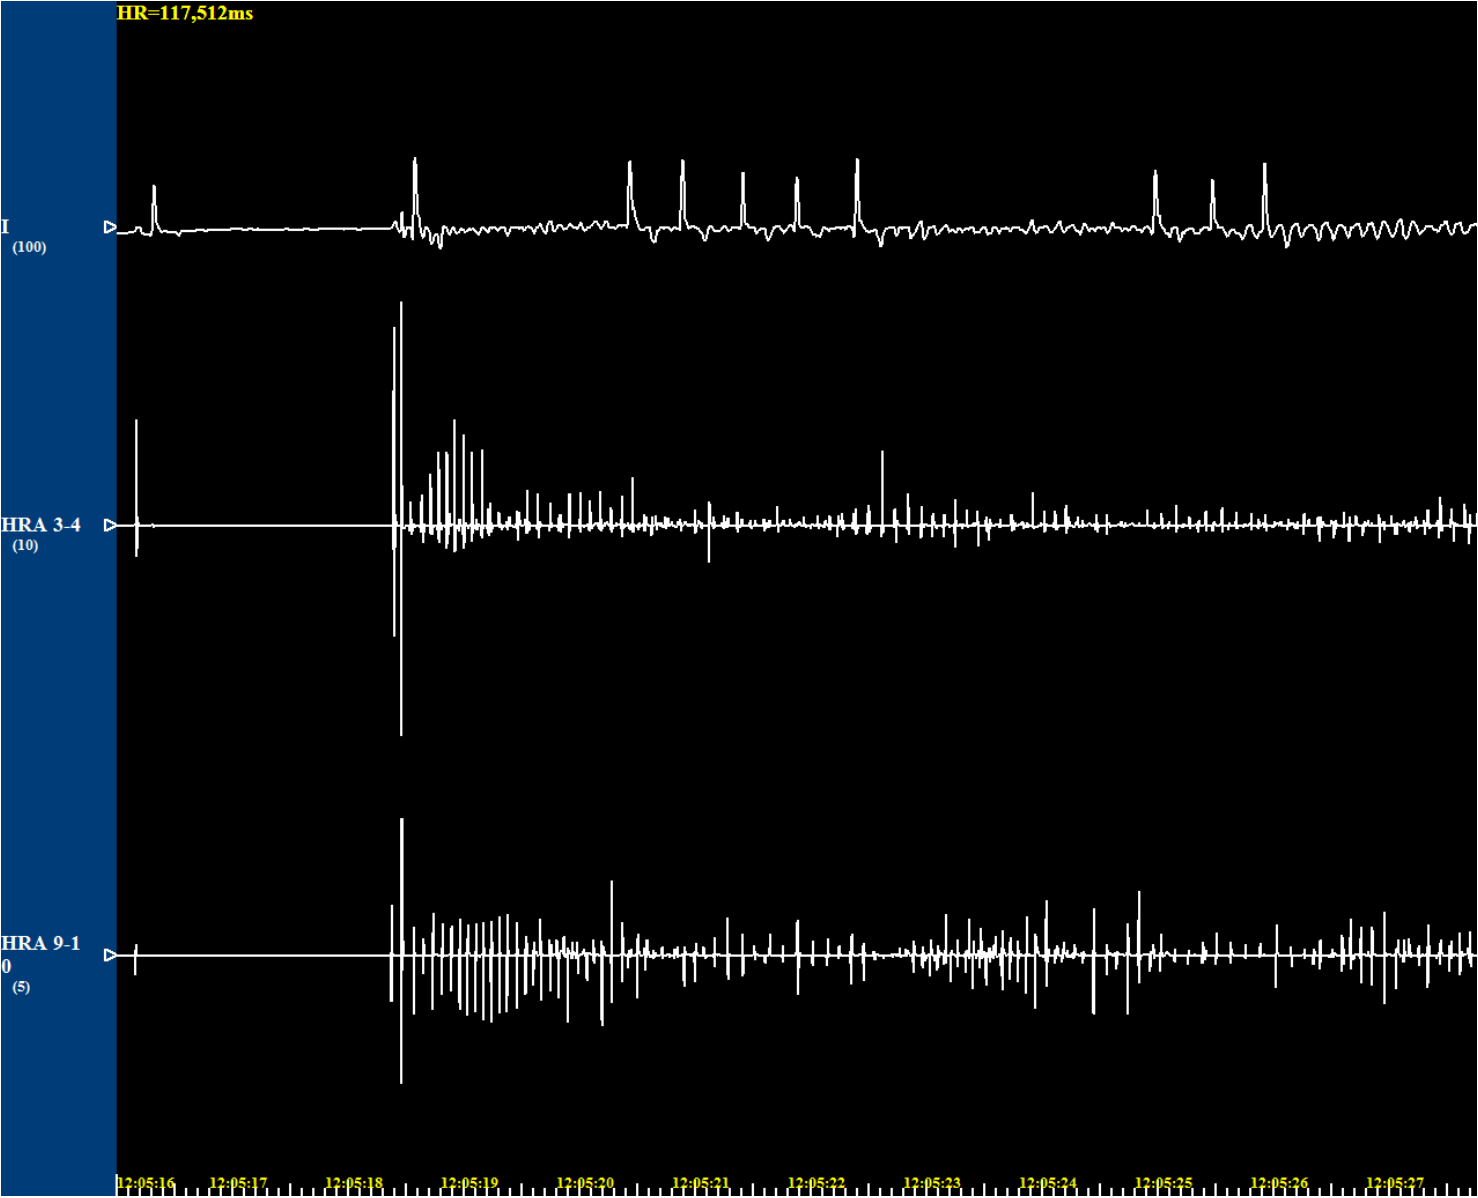



B (Fig 2E)

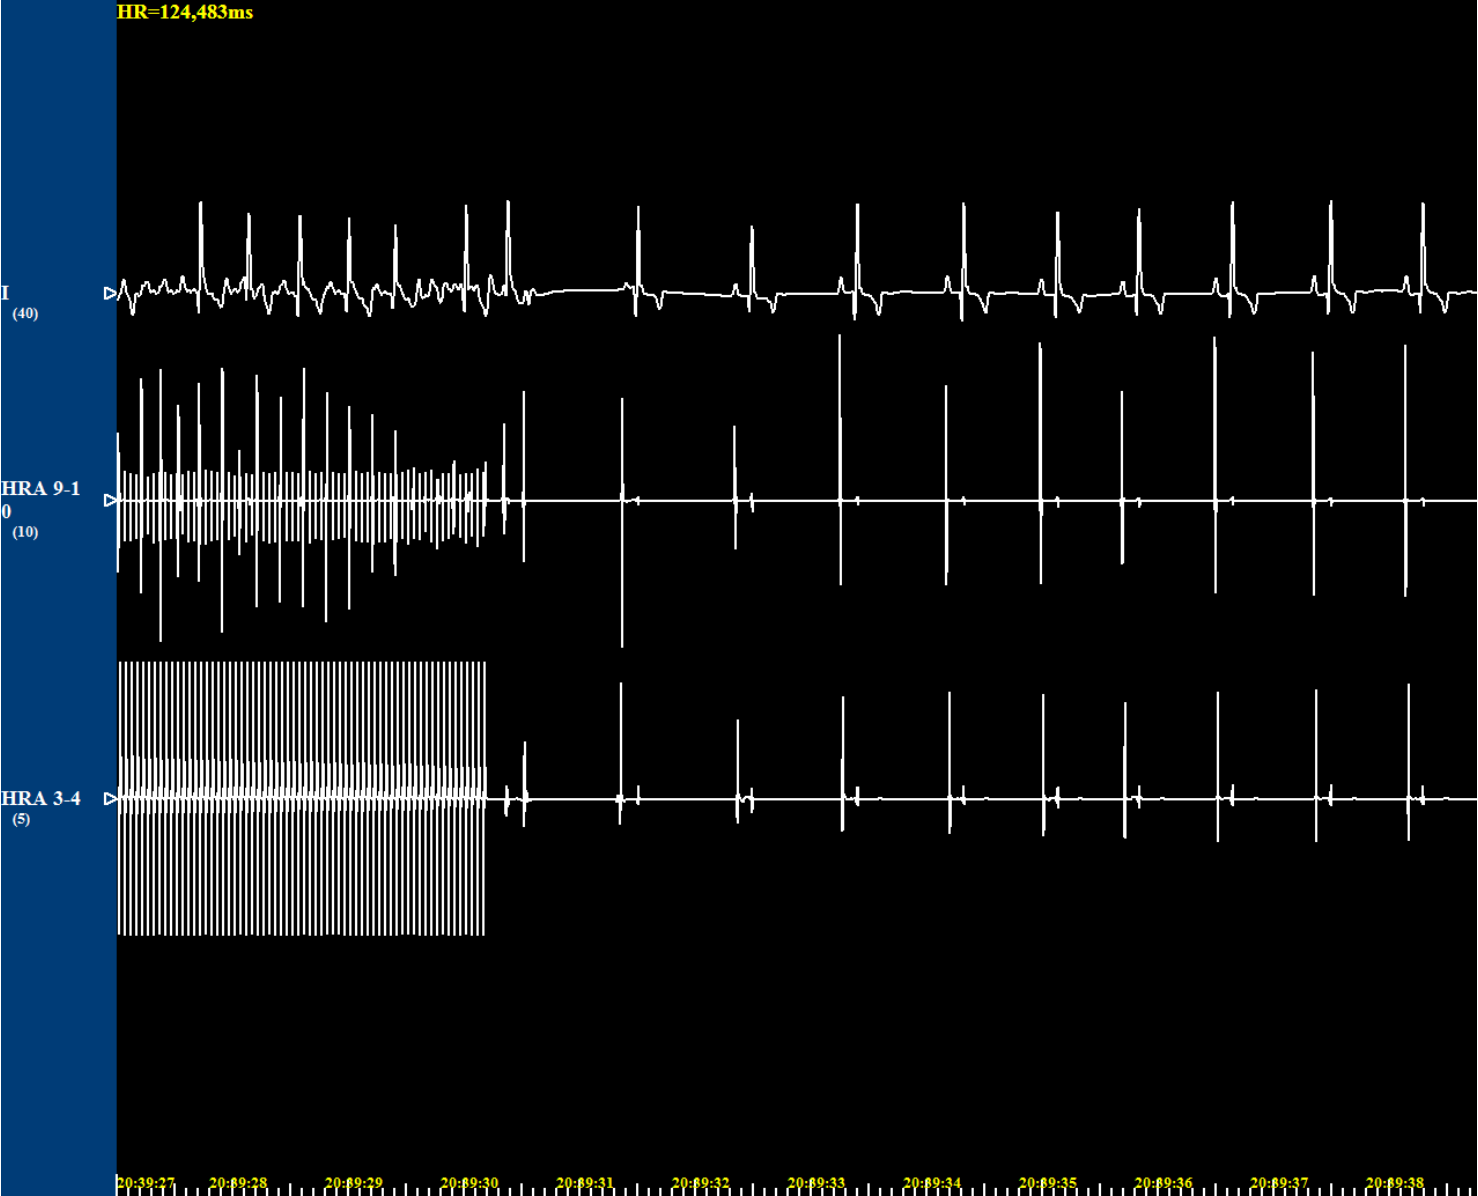

# C (Fig 2F)

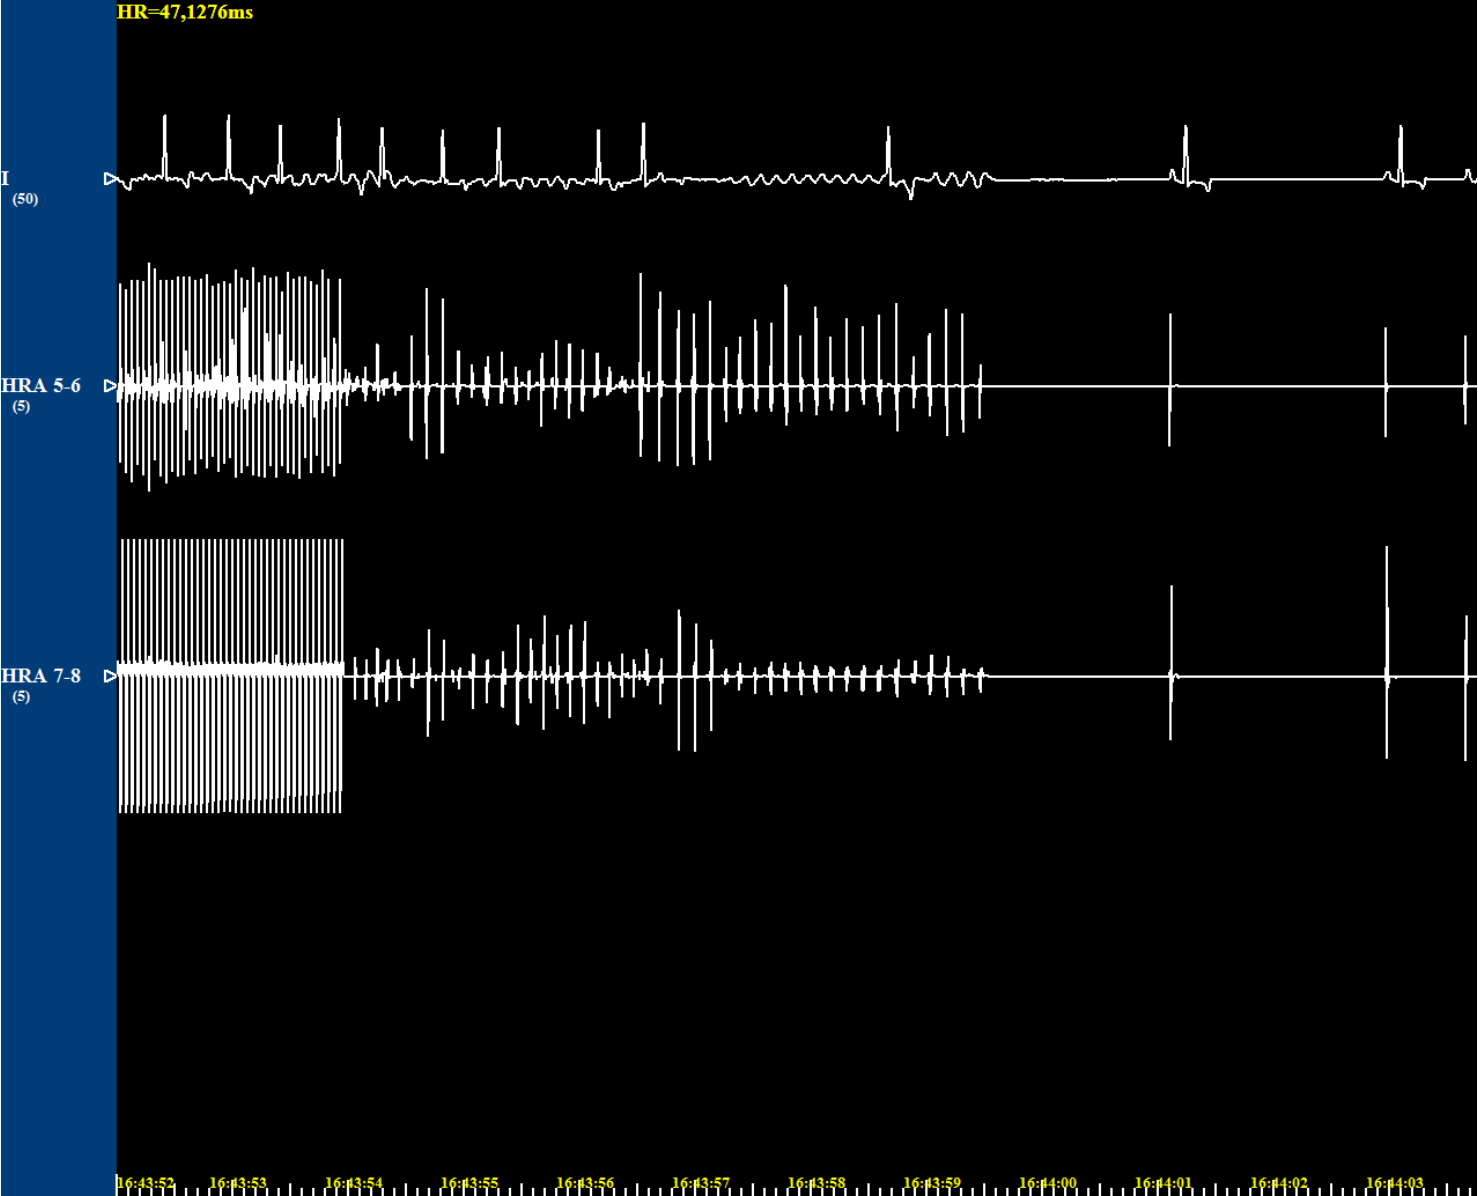

# D (Fig 2G)

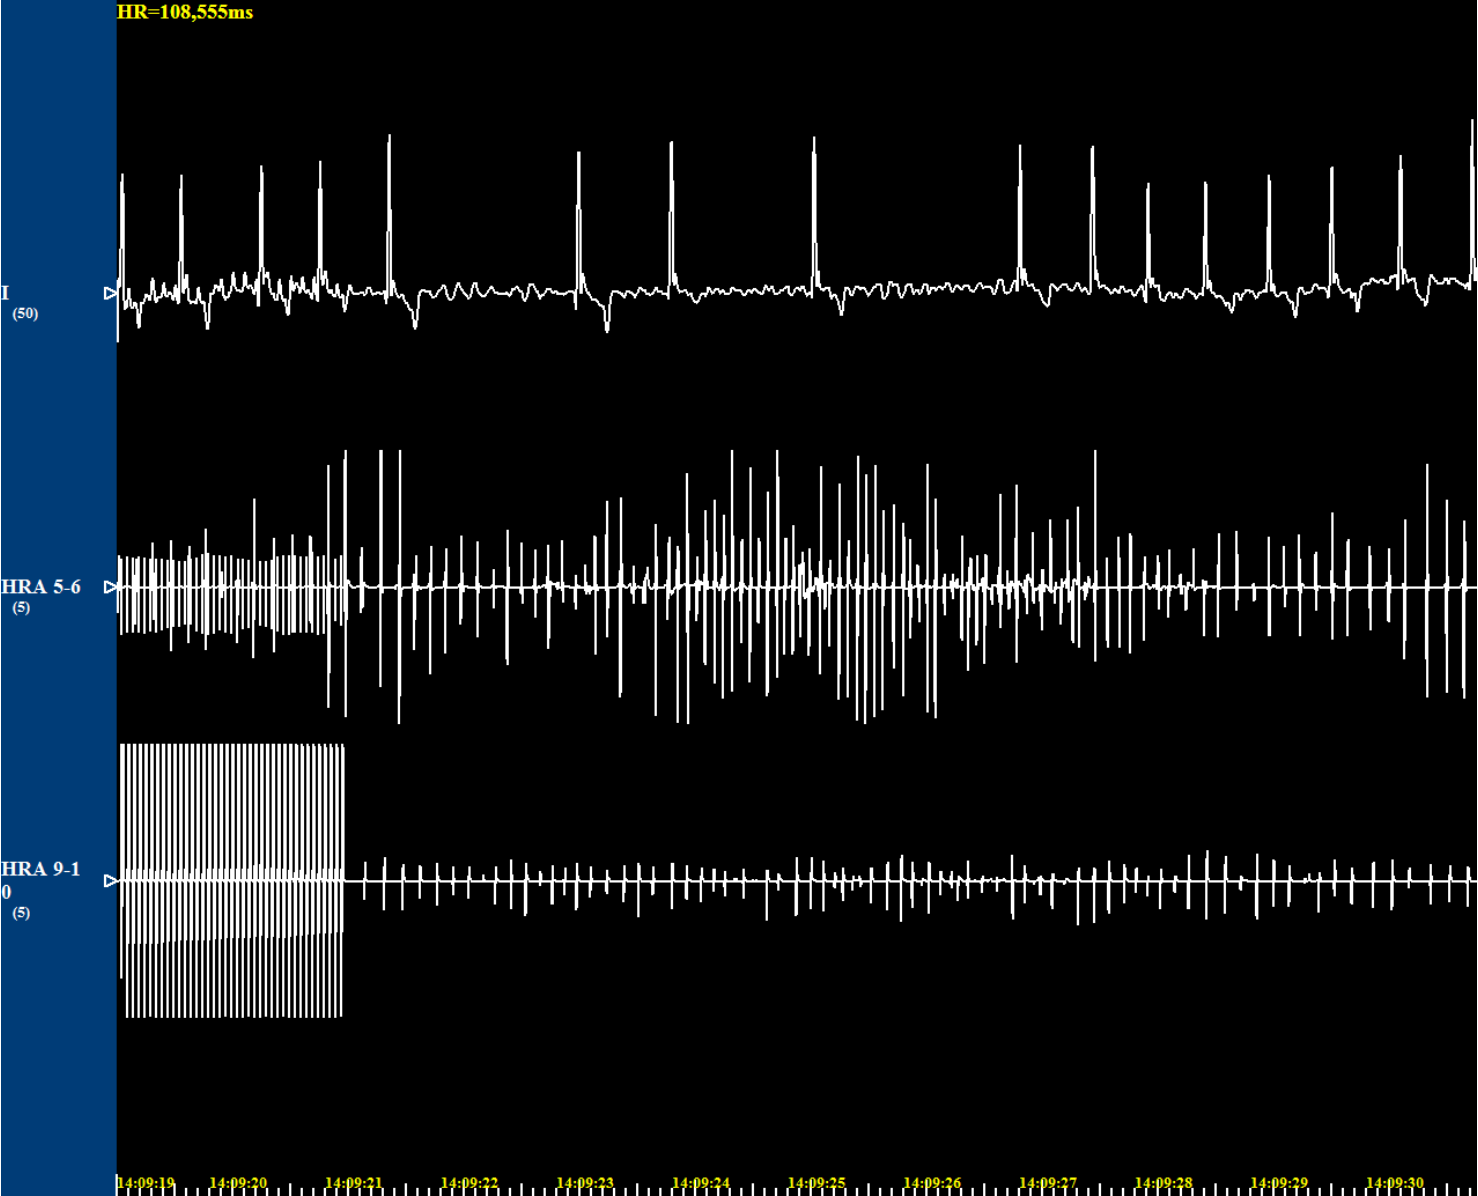

# E (Fig 2H)

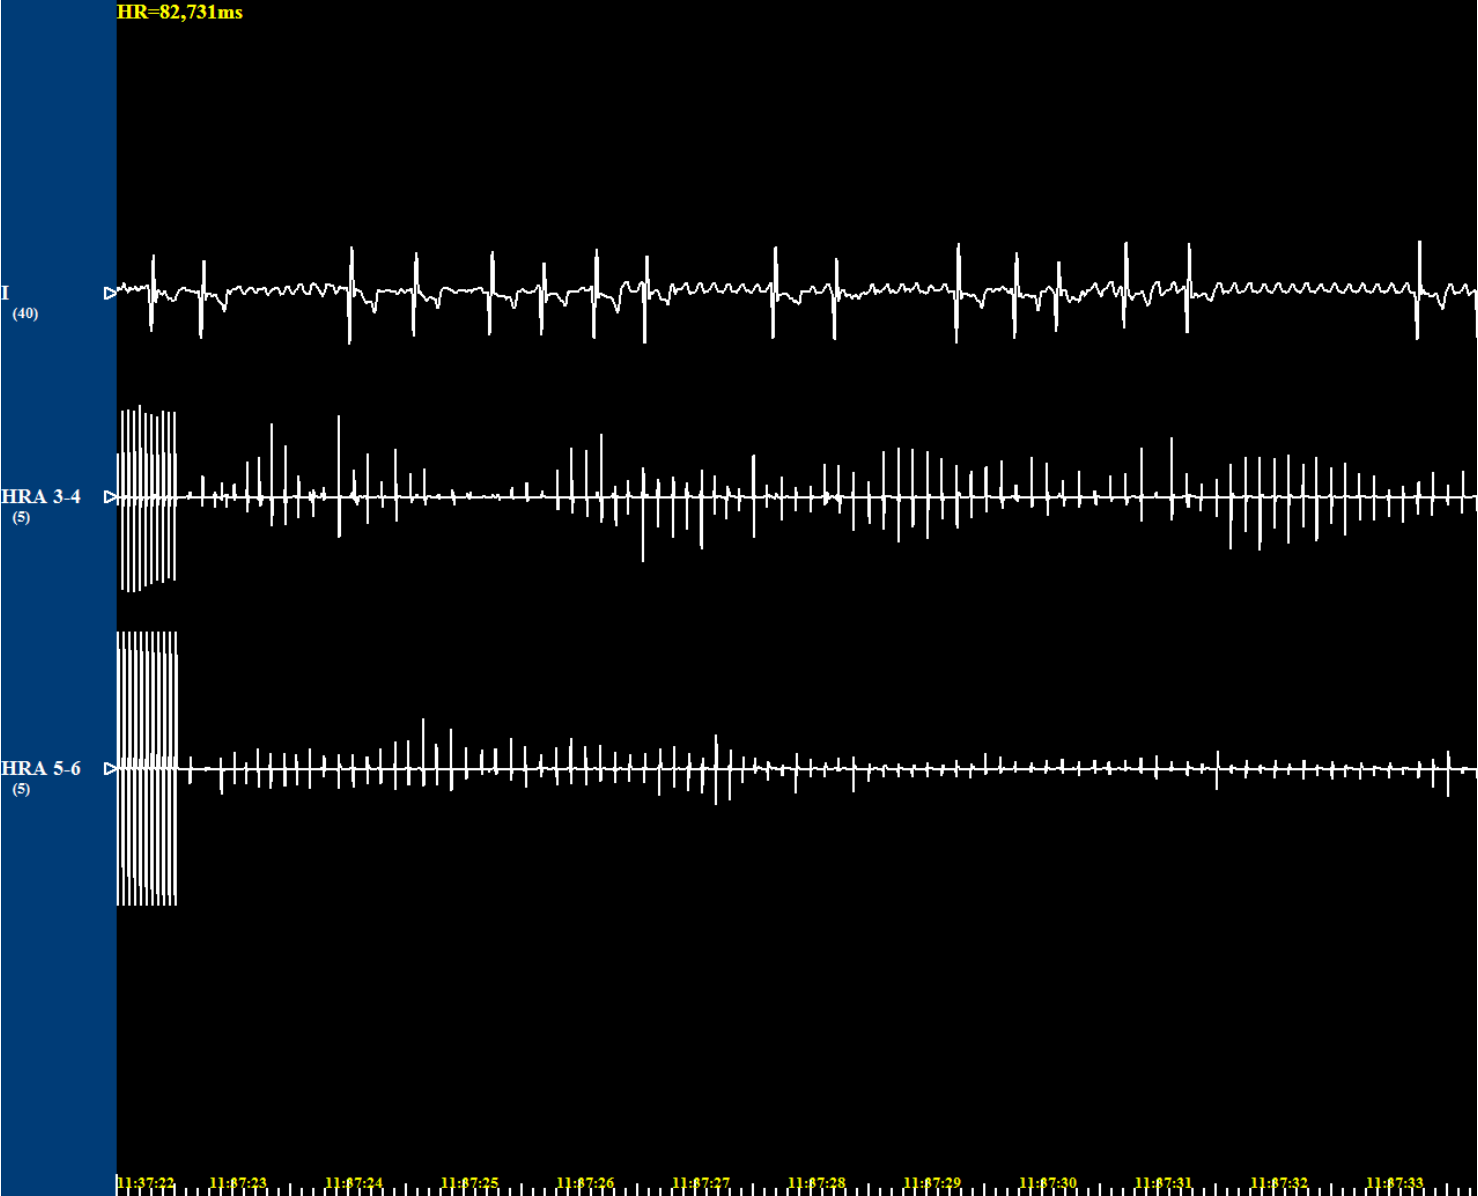

Supplement: pone.0247308.s002.pdf [file pone.0247308.s002.pdf]
